# Supplementary material
Source: PubMed Central journal article supplement (PMC5111502)
Supplement: jciinsight-1-88632-s001.pdf [file jciinsight-1-88632-s001.pdf]

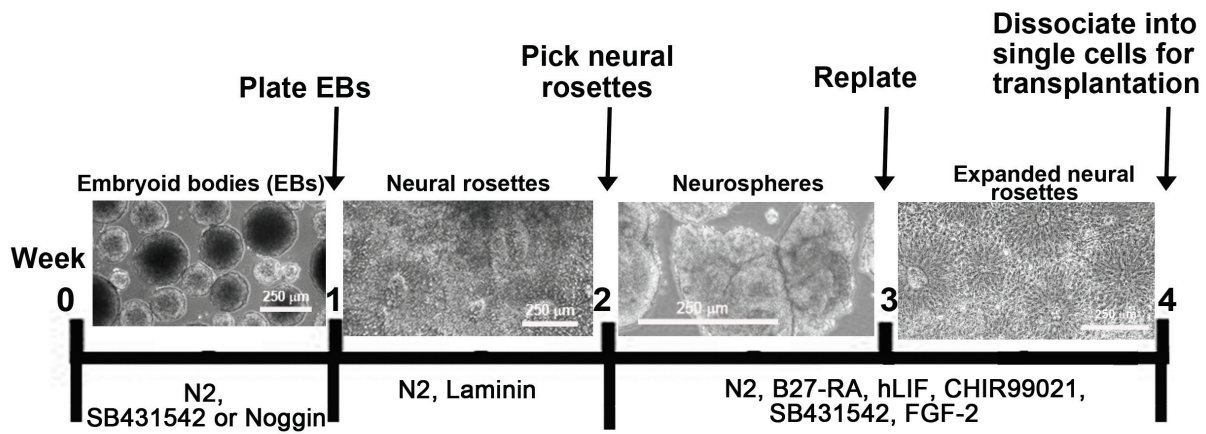

**Supplemental Figure 1. A schematic diagram showing the differentiation of rosette-type primitive NPCs from hiPSCs.** hiPSCs, human induced pluripotent stem cells; NPCs, neural progenitor cells; hLIF, human leukemia inhibitory factor; FGF-2, fibroblast growth factor-2.

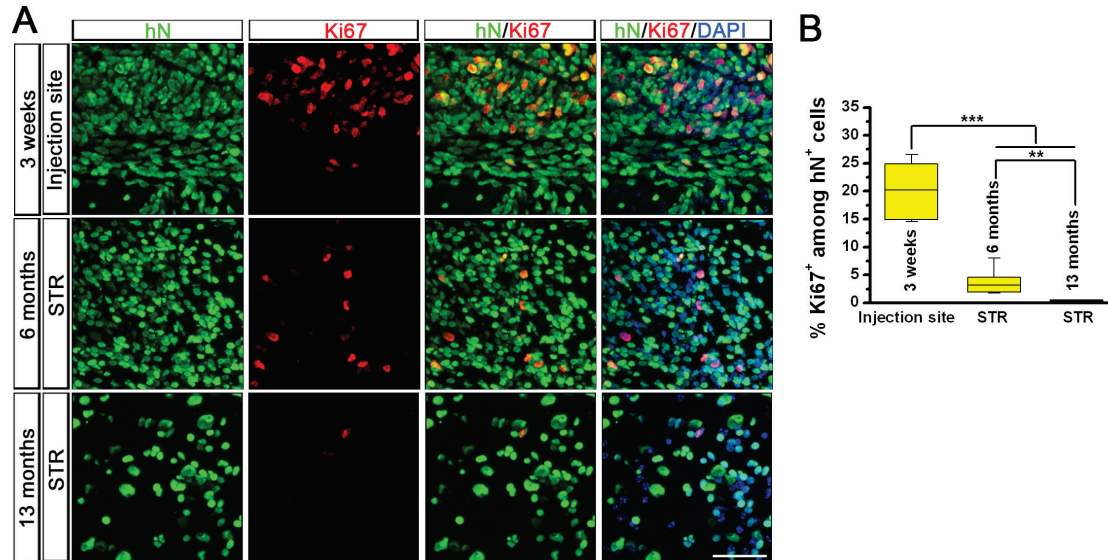

**Supplemental Figure 2. The proliferation of engrafted hiPSC-pNPCs in the mouse brain.**

(A) Representatives of hN<sup>+</sup> and Ki67<sup>+</sup> proliferating cells at the injection site at 3 weeks and in the striatum (STR) at 6 and 13 months. Scale bar represents 50  $\mu$ m. (B) The percentage of Ki67<sup>+</sup> proliferating cells in the hN<sup>+</sup> human cells from 3 weeks to 13 months (n = 6 for each group). All quantitative data are analyses of pooled data collected from transplantation of hiPSC1- and hiPSC2-pNPCs. Data are presented as whisker-box plots. The central horizontal bars indicate the medians, boxes indicate 25th to 75th percentiles, and whiskers indicate the range of the data points. One-way ANOVA was performed to assess the significance. \*\*P < 0.01 and \*\*\*P < 0.001. hN, human nuclei; hiPSC-pNPCs, hiPSC-derived primitive neural progenitor cells.

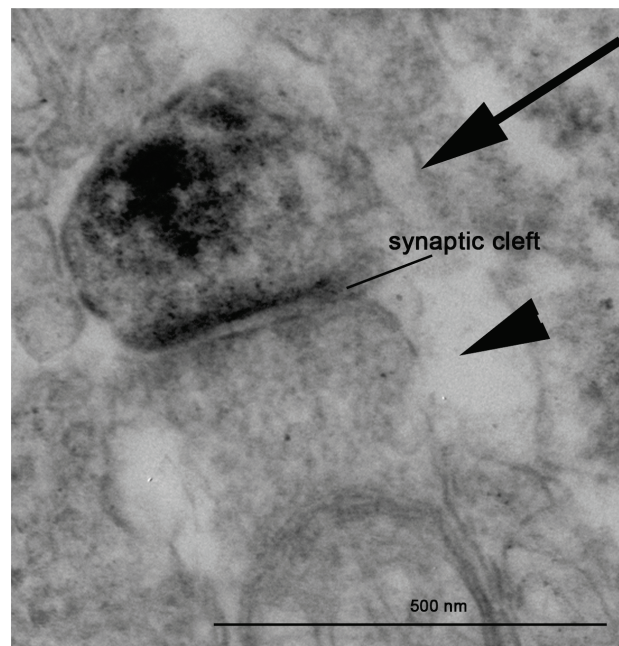

**Supplemental Figure 3. A synaptic terminal formed between human neurons labeled by DAB staining against hN-CAM (arrow) and mouse neurons that were not labeled by the DAB staining (arrowhead). Synaptic cleft structure was seen in the synaptic terminal. Scale bar represents 500 nm. hN-CAM, human specific neural cell adhesion molecule; DAB, diaminobenzidine.**

**Supplemental Table 1. A list of antibodies used.**

| <b>Antibodies</b>   | <b>Vendor/Catalog #.</b> | <b>Type</b> | <b>Dilution</b> |
|---------------------|--------------------------|-------------|-----------------|
| GFAP                | Millipore/AB5804         | Rabbit IgG  | 1:1000          |
| Human Nestin        | R&D/MAB1259              | Mouse IgG   | 1:400           |
| Human nuclei        | Millipore/MAB4383        | Mouse IgG   | 1:100           |
| Human MAP2          | Santa Cruz/sc-390543     | Mouse IgG   | 1:50            |
| Human N-CAM         | Millipore/CBL275         | Mouse IgG   | 1:50            |
| $\beta$ III-tubulin | Covance/PRB-435P         | Rabbit IgG  | 1:1000          |
| Ki67                | Cell signaling/9129      | Rabbit IgG  | 1:400           |
| NG2                 | Millipore/AB5320         | Rabbit IgG  | 1:200           |
| MBP                 | Millipore/MAB386         | Rat IgG     | 1:100           |
| Olig2               | Phosphosolutions/1538    | Rabbit IgG  | 1:1000          |
| Pax6                | GeneTex/GTX113241        | Rabbit IgG  | 1:400           |
| Doublecortin        | Cell signaling/4604      | Rabbit IgG  | 1:500           |
| NeuN                | Millipore/ABN78          | Rabbit IgG  | 1:500           |
| GABA                | Sigma/A2052              | Rabbit IgG  | 1:1000          |
| Tbr1                | Millipore/AB2261         | Chicken IgY | 1:200           |
| Synapsin-1          | Millipore/MAB1543        | Rabbit IgG  | 1:1000          |
| c-Fos               | Santa Cruz/sc-390543     | Rabbit IgG  | 1:50            |
| PSD-95              | Invitrogen/51-6900       | Rabbit IgG  | 1:400           |
| OCT4                | Santa Cruz/sc-5279       | Mouse IgG   | 1:100           |
